# Supplementary material for: A meta-analysis to assess long-term spatiotemporal changes of benthic coral and macroalgae cover in the Mexican Caribbean
Source: PubMed Central journal article supplement (PMC7264131; doi:10.1038/s41598-020-65801-8), 2020-06-01
Supplement: 41598_2020_65801_MOESM1_ESM.pdf [file 41598_2020_65801_MOESM1_ESM.pdf]

# Supplementary Information

## **A meta-analysis to assess long-term spatiotemporal changes of benthic coral and macroalgae cover in the Mexican Caribbean**

Ameris I. Contreras-Silva<sup>1\*</sup>, Arjen Tilstra<sup>1</sup>, Valentina Migani<sup>2</sup>, Andra Thiel<sup>2</sup>, Esmeralda Pérez-Cervantes<sup>3</sup>, Nuria Estrada-Saldivar<sup>3</sup>, Xochitl Elias<sup>1</sup>, Claudius Mott<sup>4</sup>, Lorenzo Alvarez-Filip<sup>3\*†</sup>, Christian Wild<sup>1\*†</sup>

<sup>1</sup>Marine Ecology Department, Faculty of Biology and Chemistry, University of Bremen, Leobener Straße UFT, 28359, Bremen, Germany

<sup>2</sup>Population and Evolutionary Ecology Group, Institute of Ecology, Faculty of Biology and Chemistry, University of Bremen, Leobener Straße 5, 28359, Bremen, Germany

<sup>3</sup>Biodiversity and Reef Conservation Laboratory, Unidad Académica de Sistemas Arrecifales, Instituto de Ciencias del Mar y Limnología, Universidad Nacional Autónoma de México, Puerto Morelos, Quintana Roo, Mexico

<sup>4</sup>Remote Sensing Solutions GmbH, Dingolfinger Str. 9, 81673 München, Germany

\*aics@unibremen.de, lorenzo@cmarl.unam.mx & christian.wild@uni-bremen.de

†These authors share senior authorship

**Supplementary Table S1.** Estimates resulting from the hard-coral meta-analyses divided by periods of time, general result and by sub-regions. ES denotes the mean effect size (ARC), n denotes the sample size, SE denotes standard error and *p* the significance of the statistical analysis.

|            | 1978-2016 |      |     |          | 1978-2004 |      |    |          | 2005-2016 |      |    |          |
|------------|-----------|------|-----|----------|-----------|------|----|----------|-----------|------|----|----------|
|            | ES        | SE   | n   | <i>p</i> | ES        | SE   | n  | <i>p</i> | ES        | SE   | n  | <i>p</i> |
| Overall MC | 1.18      | 2.64 | 125 | 0.656    | -12.16    | 4.68 | 35 | 0.0094   | 5.19      | 1.36 | 92 | 0.0001   |
| North      | 6.47      | 4.12 | 50  | 0.1161   | -2.40     | 4.51 | 16 | 0.5952   | 3.78      | 2.31 | 32 | 0.1022   |
| Cozumel    | 4.05      | 4.55 | 41  | 0.3736   | -1.67     | 5.45 | 11 | 0.76     | 8.75      | 2.18 | 35 | <0.0001  |
| Center     | -14.15    | 7.06 | 17  | 0.0451   | -68.55    | 9.04 | 4  | <0.0001  | 2.59      | 3.56 | 13 | 0.4681   |
| South      | -5.58     | 6.86 | 18  | 0.4159   | -23.82    | 9.01 | 4  | 0.0082   | 1.30      | 3.71 | 12 | 0.7272   |

**Supplementary Table S2.** Estimates resulting from the macroalgae meta-analyses divided by periods of time, general result and by sub-regions. ES denotes the mean effect size (ARC), n denotes the sample size, SE denotes standard error and *p* the significance of the statistical analysis.

|            | 1989-2016 |      |    |          | 1989-2004 |       |    |          | 2005-2016 |      |    |          |
|------------|-----------|------|----|----------|-----------|-------|----|----------|-----------|------|----|----------|
|            | ES        | SE   | n  | <i>p</i> | ES        | SE    | n  | <i>p</i> | ES        | SE   | n  | <i>p</i> |
| Overall MC | 10.87     | 1.77 | 94 | <0.0001  | 8.77      | 4.35  | 15 | 0.0437   | 12.06     | 1.84 | 85 | <0.0001  |
| North      | 6.28      | 3.19 | 29 | 0.0489   | 0         | 12.31 | 2  | 1        | 6.60      | 3.16 | 28 | 0.0365   |
| Cozumel    | 12.05     | 2.72 | 40 | <0.0001  | 2.87      | 3.73  | 11 | 0.44     | 16.55     | 2.87 | 34 | <0.0001  |
| Center     | 15.20     | 4.76 | 13 | 0.0014   | 28.51     | 12.44 | 2  | 0.02     | 14.10     | 4.82 | 12 | 0.0034   |
| South      | 13.36     | 4.96 | 12 | 0.007    | 35.60     | 8.69  | 2  | <0.0001  | 9.85      | 5.04 | 11 | 0.0506   |

**Supplementary Table S3.** Reef sites used for hard coral cover analyses. MPA (Marine Protected Area), Pub (origin of the information, 0 = monitoring or grey literature data; 1 = published data). NA = not available.

| <i>Num</i> | <i>Site_code</i>                 | <i>Latitude</i> | <i>Longitude</i> | <i>Region</i> | <i>Municipality</i> | <i>Depth</i> | <i>MPA</i> | <i>Pub</i> |
|------------|----------------------------------|-----------------|------------------|---------------|---------------------|--------------|------------|------------|
| 1          | Akumal Garcia                    | 20.398          | -87.3052         | Northern      | Tulum               | 10           | 0          | 0          |
| 2          | Akumal Garza                     | 20.406          | -87.30056        | Northern      | Tulum               | 10           | 0          | 0          |
| 3          | Akumal Harvell                   | 20.398          | -87.3061         | Northern      | Tulum               | NA           | 0          | 0          |
| 4          | Akumal Rodriguez                 | 20.383          | -87.3151         | Northern      | Tulum               | 7            | 0          | 1          |
| 5          | Boca Paila Garza                 | 19.975          | -87.4284         | Center        | F.Carrillo.Puerto   | 10           | 1          | 0          |
| 6          | Bonanza                          | 20.965          | -86.81408        | Northern      | Puerto.Morelos      | 2            | 1          | 0          |
| 7          | Cancun Barranco                  | 21.181          | -86.75833        | Northern      | Isla.Mujeres        | NA           | 1          | 1          |
| 8          | Cardona Mera Somero              | 20.408          | -87.01955        | Cozumel       | Cozumel             | 5            | 1          | 0          |
| 9          | Cardona ReefKeeper               | 20.414          | -87.02031        | Cozumel       | Cozumel             | NA           | 1          | 0          |
| 10         | Chankanaab                       | 20.44           | -87.00295        | Cozumel       | Cozumel             | 12           | 1          | 0          |
| 11         | Chankanaab Bolones               | 20.44           | -87.00295        | Cozumel       | Cozumel             | NA           | 1          | 0          |
| 12         | Chankanaab Bolones Mera Profundo | 20.44           | -87.00512        | Cozumel       | Cozumel             | 18           | 1          | 0          |
| 13         | Chankanaab Mera Somero           | 20.439          | -86.99961        | Cozumel       | Cozumel             | 12           | 1          | 0          |
| 14         | Chitales Jordan                  | 21.141          | -86.7437         | Northern      | Cancun              | NA           | 1          | 1          |
| 15         | Colombia                         | 20.324          | -87.02719        | Cozumel       | Cozumel             | 12           | 1          | 0          |
| 16         | Colombia Mera Profundo           | 20.31           | -87.02565        | Cozumel       | Cozumel             | 18.5         | 1          | 0          |
| 17         | Colombia Mera Somero             | 20.32           | -87.02437        | Cozumel       | Cozumel             | 6.5          | 1          | 0          |
| 18         | Colombia ReefKeeper              | 20.326          | -87.01681        | Cozumel       | Cozumel             | NA           | 1          | 0          |
| 19         | Cozumel Barranco                 | 20.426          | -87.0159         | Cozumel       | Cozumel             | NA           | 1          | 1          |
| 20         | Cozumel Garcia                   | 20.329          | -87.0269         | Cozumel       | Cozumel             | 10           | 1          | 0          |
| 21         | Cuevones                         | 21.162          | -86.74199        | Northern      | Isla.Mujeres        | 7            | 1          | 0          |
| 22         | Dalila                           | 20.349          | -87.02906        | Cozumel       | Cozumel             | 12           | 1          | 0          |
| 23         | DzulHa Mera Somero               | 20.459          | -86.98709        | Cozumel       | Cozumel             | 3            | 1          | 0          |
| 24         | Hanan                            | 20.505          | -86.757          | Cozumel       | Cozumel             | 5            | 1          | 0          |

|    |                    |        |           |          |                   |    |   |   |
|----|--------------------|--------|-----------|----------|-------------------|----|---|---|
| 25 | Hanan II           | 20.499 | -86.761   | Cozumel  | Cozumel           | 8  | 1 | 0 |
| 26 | Islote             | 20.441 | -87.00233 | Cozumel  | Cozumel           | 15 | 1 | 0 |
| 27 | Ixlache            | 21.435 | -86.78    | Northern | Isla.Mujeres      | 2  | 1 | 0 |
| 28 | Jardines           | 20.833 | -86.87844 | Northern | Puerto.Morelos    | 2  | 1 | 0 |
| 29 | La Bocana          | 20.875 | -86.85172 | Northern | Puerto.Morelos    | 4  | 1 | 0 |
| 30 | La Pared           | 20.824 | -86.87753 | Northern | Puerto.Morelos    | 4  | 1 | 0 |
| 31 | Las Redes_13       | 20.389 | -87.31028 | Northern | Tulum             | 13 | 0 | 1 |
| 32 | Limonos            | 20.988 | -86.79719 | Northern | Puerto.Morelos    | 3  | 1 | 0 |
| 33 | Mah01              | 18.663 | -87.71636 | Southern | Othon.P.Blanco    | 11 | 0 | 0 |
| 34 | Mahahual Arias     | 18.712 | -87.70329 | Southern | Othon.P.Blanco    | 15 | 0 | 1 |
| 35 | Mahahual Garza     | 18.712 | -87.70333 | Southern | Othon.P.Blanco    | 10 | 0 | 0 |
| 36 | Mahahual Harvell   | 18.723 | -87.6971  | Southern | Othon.P.Blanco    | NA | 0 | 0 |
| 37 | Mahahual Rodríguez | 18.805 | -87.6583  | Southern | Othon.P.Blanco    | 10 | 0 | 1 |
| 38 | Media Luna_13      | 20.402 | -87.30272 | Northern | Tulum             | 13 | 0 | 1 |
| 39 | MX1005             | 19.75  | -87.40317 | Center   | F.Carrillo.Puerto | 17 | 1 | 0 |
| 40 | MX1006             | 19.829 | -87.4399  | Center   | F.Carrillo.Puerto | 18 | 1 | 0 |
| 41 | MX1008             | 20.057 | -87.46059 | Center   | F.Carrillo.Puerto | 17 | 1 | 0 |
| 42 | MX1010             | 20.348 | -87.33246 | Northern | Tulum             | 16 | 0 | 0 |
| 43 | MX1017             | 21.171 | -86.72976 | Northern | Isla.Mujeres      | 6  | 1 | 0 |
| 44 | MX1020             | 18.65  | -87.71769 | Southern | Othon.P.Blanco    | 11 | 0 | 0 |
| 45 | MX1026             | 19.13  | -87.53735 | Center   | F.Carrillo.Puerto | 8  | 1 | 0 |
| 46 | MX1028             | 19.239 | -87.49639 | Center   | F.Carrillo.Puerto | 14 | 1 | 0 |
| 47 | MX1034             | 19.591 | -87.39506 | Center   | F.Carrillo.Puerto | 10 | 1 | 0 |
| 48 | MX1035             | 19.74  | -87.4135  | Center   | F.Carrillo.Puerto | 6  | 1 | 0 |
| 49 | MX1037             | 19.869 | -87.4194  | Center   | F.Carrillo.Puerto | 12 | 1 | 0 |
| 50 | MX1042             | 20.115 | -87.45794 | Center   | Tulum             | 9  | 1 | 0 |
| 51 | MX1043             | 20.259 | -87.38535 | Northern | Tulum             | 8  | 0 | 0 |
| 52 | MX1047             | 20.39  | -87.31046 | Northern | Tulum             | 10 | 0 | 0 |

|    |                                 |        |           |          |                   |    |   |   |
|----|---------------------------------|--------|-----------|----------|-------------------|----|---|---|
| 53 | MX1048                          | 20.358 | -87.02822 | Cozumel  | Cozumel           | 12 | 1 | 0 |
| 54 | MX1050                          | 20.536 | -87.16451 | Northern | Solidaridad       | 11 | 0 | 0 |
| 55 | MX1053                          | 20.486 | -86.97072 | Cozumel  | Cozumel           | 5  | 1 | 0 |
| 56 | MX1055                          | 20.584 | -87.10606 | Northern | Solidaridad       | 7  | 0 | 0 |
| 57 | MX1057                          | 20.641 | -87.05353 | Northern | Solidaridad       | 2  | 0 | 0 |
| 58 | MX1059                          | 18.209 | -87.82293 | Southern | Othon.P.Blanco    | 7  | 1 | 0 |
| 59 | MX1062                          | 21.01  | -86.77834 | Northern | Isla.Mujeres      | 12 | 1 | 0 |
| 60 | MX1065                          | 18.353 | -87.7907  | Southern | Othon.P.Blanco    | 12 | 1 | 0 |
| 61 | MX1066                          | 21.46  | -86.78122 | Northern | Isla.Mujeres      | 7  | 1 | 0 |
| 62 | MX1109                          | 19.647 | -87.41732 | Center   | F.Carrillo.Puerto | 2  | 1 | 0 |
| 63 | MX1116                          | 20.551 | -87.14924 | Northern | Solidaridad       | 2  | 0 | 0 |
| 64 | MX1117                          | 20.218 | -87.41906 | Northern | Tulum             | 3  | 0 | 0 |
| 65 | MX1131                          | 20.916 | -86.8288  | Northern | Puerto.Morelos    | 4  | 1 | 0 |
| 66 | MX1132a                         | 20.987 | -86.79642 | Northern | Puerto.Morelos    | 2  | 1 | 0 |
| 67 | MX1132b                         | 20.987 | -86.79642 | Northern | Puerto.Morelos    | 2  | 1 | 0 |
| 68 | MX1133                          | 21.133 | -86.74054 | Northern | Isla.Mujeres      | 4  | 1 | 0 |
| 69 | MX1134                          | 21.199 | -86.72548 | Northern | Isla.Mujeres      | 6  | 1 | 0 |
| 70 | MX1136                          | 18.35  | -87.79838 | Southern | Othon.P.Blanco    | 1  | 1 | 0 |
| 71 | MX2007                          | 19.835 | -87.44176 | Center   | F.Carrillo.Puerto | 13 | 1 | 0 |
| 72 | MX2033                          | 19.45  | -87.43655 | Center   | F.Carrillo.Puerto | 11 | 1 | 0 |
| 73 | MX2067                          | 18.4   | -87.76702 | Southern | Othon.P.Blanco    | 10 | 1 | 0 |
| 74 | MX3009                          | 20.272 | -86.99994 | Cozumel  | Cozumel           | 7  | 1 | 0 |
| 75 | MX3021                          | 18.783 | -87.65809 | Southern | Othon.P.Blanco    | 12 | 0 | 0 |
| 76 | MX3054                          | 20.511 | -86.7524  | Cozumel  | Cozumel           | 12 | 1 | 0 |
| 77 | MXXCK01                         | 18.214 | -87.82744 | Southern | Othon.P.Blanco    | 9  | 1 | 0 |
| 78 | MXXCK02                         | 18.24  | -87.82623 | Southern | Othon.P.Blanco    | 7  | 1 | 0 |
| 79 | Palancar Herradura              | 20.331 | -87.02742 | Northern | Cozumel           | NA | 1 | 0 |
| 80 | Palancar Jardines Mera Profundo | 20.334 | -87.02722 | Cozumel  | Cozumel           | 22 | 1 | 0 |

|     |                                 |        |           |          |                   |    |   |   |
|-----|---------------------------------|--------|-----------|----------|-------------------|----|---|---|
| 81  | Palancar Jardines Mera Somero   | 20.332 | -87.0262  | Cozumel  | Cozumel           | 6  | 1 | 0 |
| 82  | Palmas Mera Profundo            | 20.455 | -86.99373 | Cozumel  | Cozumel           | 25 | 1 | 0 |
| 83  | Paraiso                         | 20.469 | -86.98303 | Cozumel  | Cozumel           | 10 | 1 | 0 |
| 84  | Paraiso Mera Somero             | 20.469 | -86.98147 | Cozumel  | Cozumel           | 4  | 1 | 0 |
| 85  | Paraiso Norte ReefKeeper        | 20.475 | -86.97957 | Cozumel  | Cozumel           | NA | 1 | 0 |
| 86  | Paraiso Sur ReefKeeper          | 20.472 | -86.98232 | Cozumel  | Cozumel           | NA | 1 | 0 |
| 87  | Paso del Cedral                 | 20.374 | -87.02894 | Cozumel  | Cozumel           | 13 | 1 | 0 |
| 88  | Puerto Morelos                  | 20.862 | -86.8559  | Northern | Puerto.Morelos    | 2  | 1 | 0 |
| 89  | Puerto Morelos Harvell          | 20.847 | -86.867   | Northern | Puerto.Morelos    | NA | 1 | 0 |
| 90  | Puerto Morelos Posterior Jordan | NA     | NA        | Northern | Puerto.Morelos    | NA | 1 | 0 |
| 95  | PuertoMorelos Rodriguez         | 20.989 | -86.7941  | Northern | Puerto.Morelos    | 5  | 1 | 1 |
| 96  | Punta Allen Rodríguez           | 19.784 | 87.4338   | Center   | Tulum             | 10 | 1 | 1 |
| 97  | Punta Francesa Mera Profundo    | 20.357 | -87.02963 | Cozumel  | Cozumel           | 17 | 1 | 0 |
| 98  | Punta Francesa Mera Somero      | 20.362 | -87.0272  | Cozumel  | Cozumel           | 7  | 1 | 0 |
| 99  | Punta Maroma_10 Jordan          | NA     | NA        | Northern | Solidaridad       | 10 | 0 | 0 |
| 101 | Punta Maroma_Posterior Jordan   | NA     | NA        | Northern | Solidaridad       | 5  | 0 | 0 |
| 104 | Punta Nizuc_Posterior Jordan    | NA     | NA        | Northern | Benito.Juarez     | 5  | 1 | 0 |
| 105 | Punta Sur Mera Profundo         | 20.301 | -87.02476 | Cozumel  | Cozumel           | 20 | 1 | 0 |
| 106 | Punta Sur Mera Somero           | 20.298 | -87.0194  | Cozumel  | Cozumel           | 4  | 1 | 0 |
| 107 | Radio Pirata                    | 20.854 | -86.86501 | Northern | Puerto.Morelos    | 1  | 1 | 0 |
| 108 | San Clemente                    | 20.408 | -87.02197 | Cozumel  | Cozumel           | 8  | 1 | 0 |
| 109 | San Francisco Mera Intermedio   | 20.397 | -87.02603 | Cozumel  | Cozumel           | 12 | 1 | 0 |
| 110 | Santa Rosa Bolones              | 20.377 | -87.02933 | Cozumel  | Cozumel           | 17 | 1 | 0 |
| 111 | Santa Rosa Mera Intermedio      | 20.378 | -87.02849 | Cozumel  | Cozumel           | 11 | 1 | 0 |
| 112 | Sta Rosa bajo                   | 20.376 | -87.02953 | Cozumel  | Cozumel           | 12 | 1 | 0 |
| 113 | Tampalam Centro                 | 19.146 | -87.53611 | Center   | F.Carrillo.Puerto | 20 | 1 | 0 |
| 114 | Tampalam Norte                  | 19.154 | -87.53333 | Center   | F.Carrillo.Puerto | 20 | 1 | 0 |
| 115 | Tanchacte Norte                 | 20.912 | -86.83608 | Northern | Puerto.Morelos    | 20 | 1 | 0 |

|     |                      |        |           |          |                |    |   |   |
|-----|----------------------|--------|-----------|----------|----------------|----|---|---|
| 116 | Tanchacte Sur        | 20.902 | -86.84227 | Northern | Puerto.Morelos | 20 | 1 | 0 |
| 117 | Tormentos            | 20.432 | -87.01257 | Cozumel  | Cozumel        | 8  | 1 | 0 |
| 118 | Tunich Mera Profundo | 20.415 | -87.0205  | Cozumel  | Cozumel        | 24 | 1 | 0 |
| 119 | Uvero Harvell        | 18.952 | -87.61    | Southern | Othon.P.Blanco | NA | 1 | 0 |
| 120 | Xcalak Harvell       | 18.26  | -87.8237  | Southern | Othon.P.Blanco | NA | 1 | 0 |
| 121 | Xcalak Fore Steneck  | 18.32  | -87.813   | Southern | Othon.P.Blanco | 13 | 1 | 1 |
| 122 | Xcalak Garcia        | 18.264 | -87.8233  | Southern | Othon.P.Blanco | 10 | 1 | 0 |
| 123 | Xcalak Patch Steneck | 18.265 | -87.828   | Southern | Othon.P.Blanco | 2  | 1 | 1 |
| 124 | Yalku Rodríguez      | 20.406 | -87.2998  | Northern | Tulum          | 10 | 0 | 1 |
| 125 | Yucab                | 20.421 | -87.01747 | Cozumel  | Cozumel        | 13 | 1 | 0 |



**Supplementary Table S4.** Reef sites used for macroalgae (calcareous and fleshy) analyses. MPA (Marine Protected Area), Pub (origin of the information, 0 = monitoring or grey literature data, 1 = published data). NA = not available.

| <i>Num</i> | <i>Site_code</i>                 | <i>Latitude</i> | <i>Longitude</i> | <i>Region</i> | <i>Municipality</i> | <i>Depth</i> | <i>MPA</i> | <i>Pub</i> |
|------------|----------------------------------|-----------------|------------------|---------------|---------------------|--------------|------------|------------|
| 1          | Akumal Garcia                    | 20.4            | -87              | Northern      | Tulum               | 10           | 0          | 0          |
| 2          | Akumal Garza                     | 20.4            | -87              | Northern      | Tulum               | 10           | 0          | 0          |
| 3          | Boca Paila Garza                 | 20              | -87              | Center        | F.Carrillo.Puerto   | 10           | 1          | 0          |
| 4          | Bonanza                          | 21              | -87              | Northern      | Puerto.Morelos      | 2            | 1          | 0          |
| 5          | Cardona Mera Somero              | 20.4            | -87              | Cozumel       | Cozumel             | 5            | 1          | 0          |
| 6          | Cardona ReefKeeper               | 20.4            | -87              | Cozumel       | Cozumel             | NA           | 1          | 0          |
| 7          | Chankanaab                       | 20.4            | -87              | Cozumel       | Cozumel             | 12           | 1          | 0          |
| 8          | Chankanaab bolones               | 20.4            | -87              | Cozumel       | Cozumel             | NA           | 1          | 0          |
| 9          | Chankanaab Bolones Mera Profundo | 20.4            | -87              | Cozumel       | Cozumel             | 18           | 1          | 0          |
| 10         | Chankanaab Mera Somero           | 20.4            | -87              | Cozumel       | Cozumel             | 12           | 1          | 0          |
| 11         | Colombia                         | 20.3            | -87              | Cozumel       | Cozumel             | 12           | 1          | 0          |
| 12         | Colombia Mera Profundo           | 20.3            | -87              | Cozumel       | Cozumel             | 19           | 1          | 0          |
| 13         | Colombia Mera Somero             | 20.3            | -87              | Cozumel       | Cozumel             | 6.5          | 1          | 0          |
| 14         | Colombia ReefKeeper              | 20.3            | -87              | Cozumel       | Cozumel             | NA           | 1          | 0          |
| 15         | Cozumel Garcia                   | 20.3            | -87              | Cozumel       | Cozumel             | 10           | 1          | 0          |
| 16         | Cuevones                         | 21.2            | -87              | Northern      | Isla.Mujeres        | 7            | 1          | 0          |
| 17         | Dalila                           | 20.3            | -87              | Cozumel       | Cozumel             | 12           | 1          | 0          |
| 18         | DzulHa Mera Somero               | 20.5            | -87              | Cozumel       | Cozumel             | 3            | 1          | 0          |
| 19         | Hanan                            | 20.5            | -87              | Cozumel       | Cozumel             | 5            | 1          | 0          |
| 20         | Hanan II                         | 20.5            | -87              | Cozumel       | Cozumel             | 8            | 1          | 0          |
| 21         | Islote                           | 20.4            | -87              | Cozumel       | Cozumel             | 15           | 1          | 0          |
| 22         | Ixlache                          | 21.4            | -87              | Northern      | Isla.Mujeres        | 2            | 1          | 0          |
| 23         | Jardines                         | 20.8            | -87              | Northern      | Puerto.Morelos      | 2            | 1          | 0          |
| 24         | La Bocana                        | 20.9            | -87              | Northern      | Puerto.Morelos      | 4            | 1          | 0          |

|    |                |      |     |          |                   |    |   |   |
|----|----------------|------|-----|----------|-------------------|----|---|---|
| 25 | La Pared       | 20.8 | -87 | Northern | Puerto.Morelos    | 4  | 1 | 0 |
| 26 | Limonos        | 21   | -87 | Northern | Puerto.Morelos    | 3  | 1 | 0 |
| 27 | Mah01          | 18.7 | -88 | Southern | Othon.P.Blanco    | 11 | 0 | 0 |
| 28 | Mahahual Arias | 18.7 | -88 | Southern | Othon.P.Blanco    | 15 | 0 | 1 |
| 29 | Mahahual Garza | 18.7 | -88 | Southern | Othon.P.Blanco    | 10 | 0 | 0 |
| 30 | MX1005         | 19.8 | -87 | Center   | F.Carrillo.Puerto | 17 | 1 | 0 |
| 31 | MX1006         | 19.8 | -87 | Center   | F.Carrillo.Puerto | 18 | 1 | 0 |
| 32 | MX1008         | 20.1 | -87 | Center   | F.Carrillo.Puerto | 17 | 1 | 0 |
| 33 | MX1010         | 20.3 | -87 | Northern | Tulum             | 16 | 0 | 0 |
| 34 | MX1017         | 21.2 | -87 | Northern | Isla.Mujeres      | 6  | 1 | 0 |
| 35 | MX1020         | 18.6 | -88 | Southern | Othon.P.Blanco    | 11 | 0 | 0 |
| 36 | MX1026         | 19.1 | -88 | Center   | F.Carrillo.Puerto | 8  | 1 | 0 |
| 37 | MX1028         | 19.2 | -87 | Center   | F.Carrillo.Puerto | 14 | 1 | 0 |
| 38 | MX1034         | 19.6 | -87 | Center   | F.Carrillo.Puerto | 10 | 1 | 0 |
| 39 | MX1035         | 19.7 | -87 | Center   | F.Carrillo.Puerto | 6  | 1 | 0 |
| 40 | MX1037         | 19.9 | -87 | Center   | F.Carrillo.Puerto | 12 | 1 | 0 |
| 41 | MX1042         | 20.1 | -87 | Center   | Tulum             | 9  | 1 | 0 |
| 42 | MX1043         | 20.3 | -87 | Northern | Tulum             | 8  | 0 | 0 |
| 43 | MX1047         | 20.4 | -87 | Northern | Tulum             | 10 | 0 | 0 |
| 44 | MX1048         | 20.4 | -87 | Cozumel  | Cozumel           | 12 | 1 | 0 |
| 45 | MX1050         | 20.5 | -87 | Northern | Solidaridad       | 11 | 0 | 0 |
| 46 | MX1053         | 20.5 | -87 | Cozumel  | Cozumel           | 5  | 1 | 0 |
| 47 | MX1055         | 20.6 | -87 | Northern | Solidaridad       | 7  | 0 | 0 |
| 48 | MX1057         | 20.6 | -87 | Northern | Solidaridad       | 2  | 0 | 0 |
| 49 | MX1059         | 18.2 | -88 | Southern | Othon.P.Blanco    | 7  | 1 | 0 |
| 50 | MX1062         | 21   | -87 | Northern | Isla.Mujeres      | 12 | 1 | 0 |
| 51 | MX1065         | 18.4 | -88 | Southern | Othon.P.Blanco    | 12 | 1 | 0 |
| 52 | MX1066         | 21.5 | -87 | Northern | Isla.Mujeres      | 7  | 1 | 0 |

|    |                                 |      |     |          |                   |    |   |   |
|----|---------------------------------|------|-----|----------|-------------------|----|---|---|
| 53 | MX1109                          | 19.6 | -87 | Center   | F.Carrillo.Puerto | 2  | 1 | 0 |
| 54 | MX1116                          | 20.6 | -87 | Northern | Solidaridad       | 2  | 0 | 0 |
| 55 | MX1117                          | 20.2 | -87 | Northern | Tulum             | 3  | 0 | 0 |
| 56 | MX1131                          | 20.9 | -87 | Northern | Puerto.Morelos    | 4  | 1 | 0 |
| 57 | MX1132a                         | 21   | -87 | Northern | Puerto.Morelos    | 2  | 1 | 0 |
| 58 | MX1132b                         | 21   | -87 | Northern | Puerto.Morelos    | 2  | 1 | 0 |
| 59 | MX1133                          | 21.1 | -87 | Northern | Isla.Mujeres      | 4  | 1 | 0 |
| 60 | MX1134                          | 21.2 | -87 | Northern | Isla.Mujeres      | 6  | 1 | 0 |
| 61 | MX1136                          | 18.3 | -88 | Southern | Othon.P.Blanco    | 1  | 1 | 0 |
| 62 | MX2007                          | 19.8 | -87 | Center   | F.Carrillo.Puerto | 13 | 1 | 0 |
| 63 | MX2033                          | 19.5 | -87 | Center   | F.Carrillo.Puerto | 11 | 1 | 0 |
| 64 | MX2067                          | 18.4 | -88 | Southern | Othon.P.Blanco    | 10 | 1 | 0 |
| 65 | MX3009                          | 20.3 | -87 | Cozumel  | Cozumel           | 7  | 1 | 0 |
| 66 | MX3021                          | 18.8 | -88 | Southern | Othon.P.Blanco    | 12 | 0 | 0 |
| 67 | MX3054                          | 20.5 | -87 | Cozumel  | Cozumel           | 12 | 1 | 0 |
| 68 | MXXCK01                         | 18.2 | -88 | Southern | Othon.P.Blanco    | 9  | 1 | 0 |
| 69 | MXXCK02                         | 18.2 | -88 | Southern | Othon.P.Blanco    | 7  | 1 | 0 |
| 70 | Palancar Jardines Mera Profundo | 20.3 | -87 | Cozumel  | Cozumel           | 22 | 1 | 0 |
| 71 | Palancar Jardines Mera Somero   | 20.3 | -87 | Cozumel  | Cozumel           | 6  | 1 | 0 |
| 72 | Palmas Mera Profundo            | 20.5 | -87 | Cozumel  | Cozumel           | 25 | 1 | 0 |
| 73 | Paraiso                         | 20.5 | -87 | Cozumel  | Cozumel           | 10 | 1 | 0 |
| 74 | Paraiso Mera Somero             | 20.5 | -87 | Cozumel  | Cozumel           | 4  | 1 | 0 |
| 75 | Paraiso Norte ReefKeeper        | 20.5 | -87 | Cozumel  | Cozumel           | NA | 1 | 0 |
| 76 | Paraiso Sur ReefKeeper          | 20.5 | -87 | Cozumel  | Cozumel           | NA | 1 | 0 |
| 77 | Paso del Cedral                 | 20.4 | -87 | Cozumel  | Cozumel           | 13 | 1 | 0 |
| 78 | Puerto Morelos                  | 20.9 | -87 | Northern | Puerto.Morelos    | 2  | 1 | 0 |
| 79 | Punta Francesa Mera Profundo    | 20.4 | -87 | Cozumel  | Cozumel           | 17 | 1 | 0 |
| 80 | Punta Francesa Mera Somero      | 20.4 | -87 | Cozumel  | Cozumel           | 7  | 1 | 0 |

|    |                               |      |     |          |                |    |   |   |
|----|-------------------------------|------|-----|----------|----------------|----|---|---|
| 81 | Punta Sur Mera Profundo       | 20.3 | -87 | Cozumel  | Cozumel        | 20 | 1 | 0 |
| 82 | Punta Sur Mera Somero         | 20.3 | -87 | Cozumel  | Cozumel        | 4  | 1 | 0 |
| 83 | Radio Pirata                  | 20.9 | -87 | Northern | Puerto.Morelos | 1  | 1 | 0 |
| 84 | San Clemente                  | 20.4 | -87 | Cozumel  | Cozumel        | 8  | 1 | 0 |
| 85 | San Francisco Mera Intermedio | 20.4 | -87 | Cozumel  | Cozumel        | 12 | 1 | 0 |
| 86 | Santa Rosa Bolones            | 20.4 | -87 | Cozumel  | Cozumel        | 17 | 1 | 0 |
| 87 | Santa Rosa Mera Intermedio    | 20.4 | -87 | Cozumel  | Cozumel        | 11 | 1 | 0 |
| 88 | Sta Rosa bajo                 | 20.4 | -87 | Cozumel  | Cozumel        | 12 | 1 | 0 |
| 89 | Tanchacte Norte               | 20.9 | -87 | Northern | Puerto.Morelos | 20 | 1 | 0 |
| 90 | Tanchacte Sur                 | 20.9 | -87 | Northern | Puerto.Morelos | 20 | 1 | 0 |
| 91 | Tormentos                     | 20.4 | -87 | Cozumel  | Cozumel        | 8  | 1 | 0 |
| 92 | Tunich Mera Profundo          | 20.4 | -87 | Cozumel  | Cozumel        | 24 | 1 | 0 |
| 93 | Xcalak Garcia                 | 18.3 | -88 | Southern | Othon.P.Blanco | 10 | 1 | 0 |
| 94 | Yucab                         | 20.4 | -87 | Cozumel  | Cozumel        | 13 | 1 | 0 |

**Supplementary Table S5. PRISMA 2009 Checklist**

| Section/topic             | #  | Checklist item                                                                                                                                                                                                                                                                                              | Reported on page # |
|---------------------------|----|-------------------------------------------------------------------------------------------------------------------------------------------------------------------------------------------------------------------------------------------------------------------------------------------------------------|--------------------|
| <b>TITLE</b>              |    |                                                                                                                                                                                                                                                                                                             |                    |
| Title                     | 1  | Identify the report as a systematic review, meta-analysis, or both.                                                                                                                                                                                                                                         | 1                  |
| <b>ABSTRACT</b>           |    |                                                                                                                                                                                                                                                                                                             |                    |
| Structured summary        | 2  | Provide a structured summary including, as applicable: background; objectives; data sources; study eligibility criteria, participants, and interventions; study appraisal and synthesis methods; results; limitations; conclusions and implications of key findings; systematic review registration number. | 1                  |
| <b>INTRODUCTION</b>       |    |                                                                                                                                                                                                                                                                                                             |                    |
| Rationale                 | 3  | Describe the rationale for the review in the context of what is already known.                                                                                                                                                                                                                              | 2                  |
| Objectives                | 4  | Provide an explicit statement of questions being addressed with reference to participants, interventions, comparisons, outcomes, and study design (PICOS).                                                                                                                                                  | 2                  |
| <b>METHODS</b>            |    |                                                                                                                                                                                                                                                                                                             |                    |
| Protocol and registration | 5  | Indicate if a review protocol exists, if and where it can be accessed (e.g., Web address), and, if available, provide registration information including registration number.                                                                                                                               | -                  |
| Eligibility criteria      | 6  | Specify study characteristics (e.g., PICOS, length of follow-up) and report characteristics (e.g., years considered, language, publication status) used as criteria for eligibility, giving rationale.                                                                                                      | 7                  |
| Information sources       | 7  | Describe all information sources (e.g., databases with dates of coverage, contact with study authors to identify additional studies) in the search and date last searched.                                                                                                                                  | 8                  |
| Search                    | 8  | Present full electronic search strategy for at least one database, including any limits used, such that it could be repeated.                                                                                                                                                                               | 7                  |
| Study selection           | 9  | State the process for selecting studies (i.e., screening, eligibility, included in systematic review, and, if applicable, included in the meta-analysis).                                                                                                                                                   | 7                  |
| Data collection process   | 10 | Describe method of data extraction from reports (e.g., piloted forms, independently, in duplicate) and any processes for obtaining and confirming data from investigators.                                                                                                                                  | -                  |
| Data items                | 11 | List and define all variables for which data were sought (e.g., PICOS, funding sources) and any assumptions and simplifications made.                                                                                                                                                                       | 7                  |

|                                    |    |                                                                                                                                                                                                                        |     |
|------------------------------------|----|------------------------------------------------------------------------------------------------------------------------------------------------------------------------------------------------------------------------|-----|
| Risk of bias in individual studies | 12 | Describe methods used for assessing risk of bias of individual studies (including specification of whether this was done at the study or outcome level), and how this information is to be used in any data synthesis. | -   |
| Summary measures                   | 13 | State the principal summary measures (e.g., risk ratio, difference in means).                                                                                                                                          | 7   |
| Synthesis of results               | 14 | Describe the methods of handling data and combining results of studies, if done, including measures of consistency (e.g., I <sup>2</sup> ) for each meta-analysis.                                                     | 8   |
| Risk of bias across studies        | 15 | Specify any assessment of risk of bias that may affect the cumulative evidence (e.g., publication bias, selective reporting within studies).                                                                           | 9   |
| Additional analyses                | 16 | Describe methods of additional analyses (e.g., sensitivity or subgroup analyses, meta-regression), if done, indicating which were pre-specified.                                                                       | 9   |
| <b>RESULTS</b>                     |    |                                                                                                                                                                                                                        |     |
| Study selection                    | 17 | Give numbers of studies screened, assessed for eligibility, and included in the review, with reasons for exclusions at each stage, ideally with a flow diagram.                                                        | 3   |
| Study characteristics              | 18 | For each study, present characteristics for which data were extracted (e.g., study size, PICOS, follow-up period) and provide the citations.                                                                           | -   |
| Risk of bias within studies        | 19 | Present data on risk of bias of each study and, if available, any outcome level assessment (see item 12).                                                                                                              | -   |
| Results of individual studies      | 20 | For all outcomes considered (benefits or harms), present, for each study: (a) simple summary data for each intervention group (b) effect estimates and confidence intervals, ideally with a forest plot.               | -   |
| Synthesis of results               | 21 | Present results of each meta-analysis done, including confidence intervals and measures of consistency.                                                                                                                | 3   |
| Risk of bias across studies        | 22 | Present results of any assessment of risk of bias across studies (see Item 15).                                                                                                                                        | -   |
| Additional analysis                | 23 | Give results of additional analyses, if done (e.g., sensitivity or subgroup analyses, meta-regression [see Item 16]).                                                                                                  | -   |
| <b>DISCUSSION</b>                  |    |                                                                                                                                                                                                                        |     |
| Summary of evidence                | 24 | Summarize the main findings including the strength of evidence for each main outcome; consider their relevance to key groups (e.g., healthcare providers, users, and policy makers).                                   | 4-7 |
| Limitations                        | 25 | Discuss limitations at study and outcome level (e.g., risk of bias), and at review-level (e.g., incomplete retrieval of identified research, reporting bias).                                                          | 6-7 |
| Conclusions                        | 26 | Provide a general interpretation of the results in the context of other evidence, and implications for future research.                                                                                                | 6-7 |
| <b>FUNDING</b>                     |    |                                                                                                                                                                                                                        |     |

|         |    |                                                                                                                                            |   |
|---------|----|--------------------------------------------------------------------------------------------------------------------------------------------|---|
| Funding | 27 | Describe sources of funding for the systematic review and other support (e.g., supply of data); role of funders for the systematic review. | - |
|---------|----|--------------------------------------------------------------------------------------------------------------------------------------------|---|
